# Supplementary material for: Fundamental studies of carbon capture using CaO-based materials
Source: Royal Society of Chemistry journal article supplement (doi:10.1039/c8ta10472g), 2019-01-01
Supplement: c8ta10472g1.pdf [file c8ta10472g1.pdf]

## Supporting Information for

### Fundamental studies of carbon capture using CaO-based materials

Hongman Sun,<sup>ab</sup> Jianqiao Wang,<sup>c</sup> Xiaotong Liu,<sup>b</sup> Boxiong Shen,<sup>1c</sup> Christopher M. A. Parlett,<sup>\*d</sup> George O. Adwek,<sup>c</sup>

Edward J. Anthony,<sup>\*e</sup> Paul T. Williams<sup>\*f</sup> and Chunfei Wu<sup>\*abc</sup>

<sup>a</sup> School of Chemistry and Chemical Engineering, Queen's University Belfast, Belfast BT7 1NN, UK

<sup>b</sup> School of Engineering and Computer Science, University of Hull, Hull HU6 7RX, UK

<sup>c</sup> School of Energy and Environmental Engineering, Hebei University of Technology, Tianjin 300401, China

<sup>d</sup> School of Chemical Engineering and Analytical Science, University of Manchester, Manchester M1 3AL, UK

<sup>e</sup> Centre for Combustion and CCS, Cranfield University, Cranfield MK43 0AL, UK

<sup>f</sup> School of Chemical and Process Engineering, University of Leeds, Leeds LS2 9JT, UK

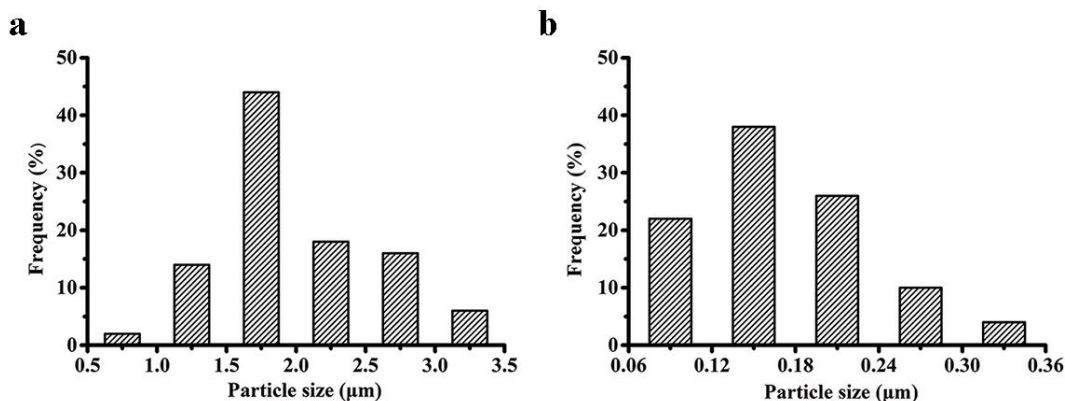

**Fig. S1** CaO grain size of a) CaO, b) sol-gel CaO calculated by SEM images in Fig.3 (a) and (b).

\*Corresponding authors:

E-mail: c.wu@qub.ac.uk (C. Wu); p.t.williams@leeds.ac.uk (P.T. Williams), b.j.anthony@cranfield.ac.uk (E.J. Anthony); christopher.parlett@manchester.ac.uk (C. Parlett); shenbx@hebut.edu.cn (B. Shen).

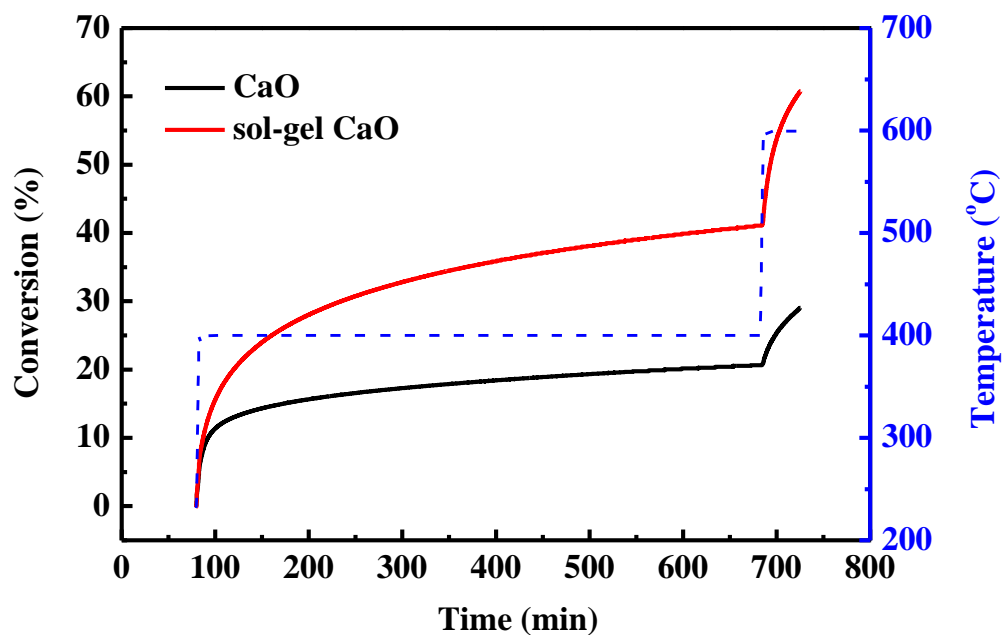

15

16

**Fig. S2** CO<sub>2</sub> capture performance at 400 °C for 10 hours in TGA reactor.

17

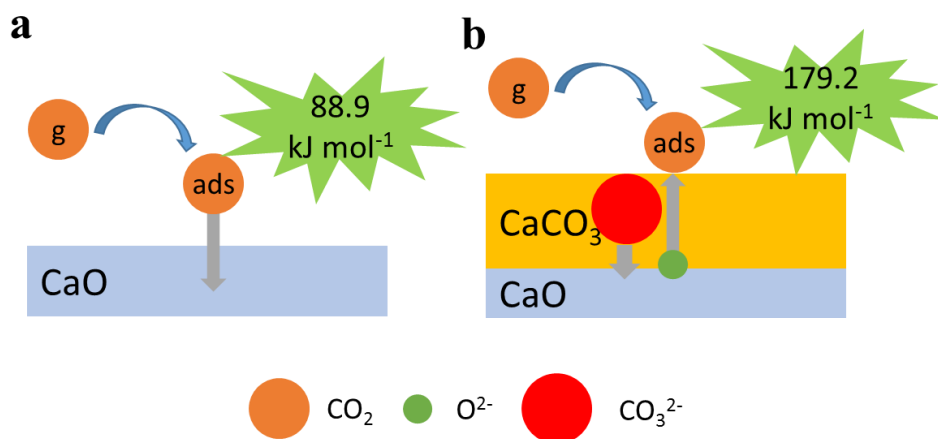

18

19

**Fig. S3** Two competing ionic diffusion processes in CaO carbonation. a)  $T < 515$  °C, b)  $T > 515$  °C.

20

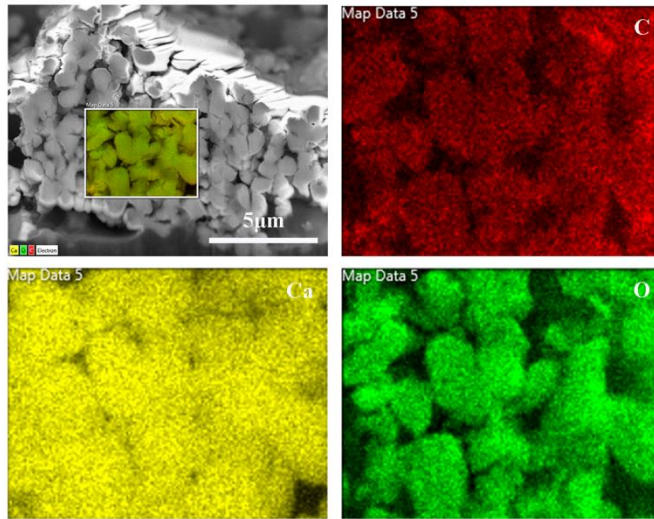

21

22

23

**Fig. S4** FIB-SEM-EDS mapping of FB-400.

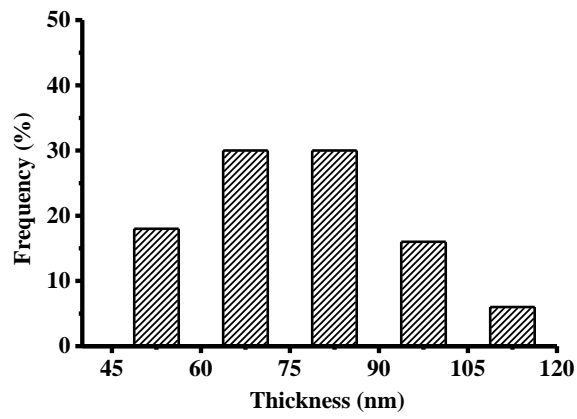

24

25

**Fig. S5** CaCO<sub>3</sub> layer thickness of FB-600.
